# Supplementary material for: Laminar Distribution of Subsets of GABAergic Axon Terminals in Human Prefrontal Cortex
Source: PubMed Central journal article supplement (PMC5820353; doi:10.3389/fnana.2018.00009), 2018-02-16
Supplement: Table_1.pdf [file Table_1.pdf]

**Supplemental Table 1**

Demographic and postmortem characteristics of human subjects used in this study. \*PMI=postmortem interval (hours); \*\*Years stored in 30% glycerin/30% ethylene glycol solution at -30°C.

| <b>Case</b>      | <b>Sex/Race</b> | <b>Age (Yrs)</b> | <b>PMI*</b> | <b>Storage Time**</b> | <b>Cause of Death</b>       |
|------------------|-----------------|------------------|-------------|-----------------------|-----------------------------|
| 727              | M/B             | 19               | 7.00        | 12.90                 | Trauma                      |
| 852              | M/W             | 54               | 8.00        | 10.90                 | Cardiac tamponade           |
| 1307             | M/B             | 32               | 4.80        | 5.20                  | ASCVD                       |
| 567              | F/W             | 46               | 15.00       | 14.80                 | Mitral valve prolapse       |
| 1047             | M/W             | 43               | 13.80       | 8.10                  | ASCVD                       |
| 739              | M/W             | 40               | 15.8        | 13                    | ASCVD                       |
| 451              | M/W             | 48               | 12.00       | 16.30                 | ASCVD                       |
| 178              | M/W             | 48               | 7.80        | 20.50                 | ASCVD                       |
| 452              | F/W             | 40               | 14.30       | 16.30                 | ASCVD                       |
| 449              | F/W             | 47               | 4.30        | 16.30                 | Accidental CO poisoning     |
| 681              | M/W             | 51               | 11.60       | 14.10                 | Hypertrophic cardiomyopathy |
| 395              | M/W             | 42               | 12.30       | 18.80                 | Pericardial tamponade       |
| 575              | F/B             | 55               | 11.30       | 15.40                 | ASCVD                       |
| 278              | M/W             | 50               | 4.50        | 20.40                 | ASCVD                       |
| 1284             | M/W             | 55               | 6.40        | 5.60                  | ASCVD                       |
| 1122             | M/W             | 55               | 15.40       | 7.30                  | Cardiac Tamponade           |
| 250              | F/W             | 47               | 5.30        | 19.70                 | ASCVD                       |
| 412              | M/W             | 42               | 14.20       | 17.50                 | Aortic stenosis             |
| 344              | M/W             | 50               | 6.80        | 18.60                 | ASCVD                       |
| 1391             | F/W             | 51               | 7.8         | 4                     | ASCVD                       |
| <b>Mean (SD)</b> |                 | 45.75 (8.69)     | 9.92 (4.04) | 13.78 (5.28)          |                             |
